# Supplementary material for: Exploring the adsorption behavior of O-containing VOCs in human breath on a B2N monolayer using DFT simulations
Source: Royal Society of Chemistry journal article supplement (doi:10.1039/d4cp01977f), 2024-01-01
Supplement: d4cp01977f1.pdf [file d4cp01977f1.pdf]

## Supporting data

### Exploring adsorption behavior of O-contained VOCs in human breath on B<sub>2</sub>N monolayer using DFT simulations

Rezvan Rahimi <sup>\*a, b</sup>, Mohammad Solimannejad<sup>\*a, b</sup>

<sup>a</sup> Department of Chemistry, Faculty of Science, Arak University, Arak 384817758, Iran

<sup>b</sup> Institute of Nanosciences and Nanotechnology, Arak University, Arak 384817758, Iran

---

\* Corresponding authors:

r.rahimi1989@gmail.com (R. Rahimi), m-solimannejad@araku.ac.ir (M. Solimannejad)

#### Optimised geometries of the studied complexes

##### Acetone/B<sub>2</sub>N:

|   |    | x        | y        | z        |
|---|----|----------|----------|----------|
| H | 1  | -0.00613 | 0.00345  | 0.00405  |
| H | 2  | -0.00621 | -0.00577 | 0.00039  |
| H | 3  | -0.01672 | 0.00572  | 0.00549  |
| H | 4  | -0.00023 | 0.02153  | -0.00038 |
| H | 5  | -0.00832 | 0.00027  | 0.00429  |
| H | 6  | -0.01444 | -0.00035 | -0.00103 |
| B | 1  | -0.00877 | -0.00110 | 0.01532  |
| B | 2  | -0.00550 | -0.01927 | 0.00424  |
| B | 3  | 0.00104  | -0.02240 | 0.01550  |
| B | 4  | -0.01948 | 0.00262  | 0.01499  |
| B | 5  | 0.00114  | -0.01248 | 0.00706  |
| B | 6  | -0.00411 | 0.01279  | 0.00514  |
| B | 7  | 0.00826  | 0.00349  | 0.00113  |
| B | 8  | -0.01334 | -0.01827 | -0.00193 |
| B | 9  | 0.00846  | 0.00385  | -0.01525 |
| B | 10 | -0.00302 | -0.00282 | -0.01288 |

|   |    |          |          |          |
|---|----|----------|----------|----------|
| B | 11 | 0.01715  | -0.00446 | -0.00515 |
| B | 12 | -0.00604 | -0.00149 | -0.01802 |
| B | 13 | -0.01064 | 0.01186  | -0.02407 |
| B | 14 | 0.00281  | -0.01386 | -0.01110 |
| B | 15 | -0.00736 | 0.00691  | 0.01221  |
| B | 16 | -0.00204 | -0.00880 | -0.00502 |
| C | 1  | -0.00345 | 0.01778  | -0.00419 |
| C | 2  | 0.01243  | 0.01682  | 0.01838  |
| C | 3  | 0.00892  | 0.01602  | 0.01146  |
| N | 1  | 0.02119  | 0.00847  | 0.00571  |
| N | 2  | 0.00387  | -0.00001 | 0.00958  |
| N | 3  | -0.00495 | -0.01171 | 0.00532  |
| N | 4  | 0.01582  | -0.01641 | -0.01023 |
| N | 5  | 0.00610  | -0.00622 | -0.00386 |
| N | 6  | -0.00560 | 0.01285  | -0.01154 |
| N | 7  | 0.01614  | -0.00607 | -0.00134 |
| N | 8  | 0.00359  | 0.00556  | -0.00603 |
| O | 1  | 0.01944  | 0.00151  | -0.00824 |

---

**Ethanol/B<sub>2</sub>N:**

|   |   | <b>x</b> | <b>y</b> | <b>z</b> |
|---|---|----------|----------|----------|
| H | 1 | -0.00185 | -0.01949 | 0.00368  |
| H | 2 | 0.03310  | -0.01024 | 0.00610  |
| H | 3 | 0.00479  | -0.00202 | -0.02201 |
| H | 4 | 0.00196  | -0.02718 | 0.01219  |
| H | 5 | -0.01636 | 0.00228  | -0.00971 |
| H | 6 | 0.01134  | -0.00181 | -0.00895 |
| B | 1 | 0.00199  | 0.00746  | -0.00402 |
| B | 2 | 0.01372  | 0.01470  | 0.01028  |
| B | 3 | -0.01063 | 0.01469  | -0.01892 |

|   |    |          |          |          |
|---|----|----------|----------|----------|
| B | 4  | 0.01847  | 0.01002  | -0.00325 |
| B | 5  | -0.00963 | -0.01018 | 0.00247  |
| B | 6  | 0.02540  | 0.00300  | -0.00096 |
| B | 7  | 0.01097  | -0.00658 | 0.00068  |
| B | 8  | 0.00349  | -0.01314 | -0.00358 |
| B | 9  | -0.00987 | 0.00876  | -0.02030 |
| B | 10 | 0.00868  | 0.00793  | 0.00027  |
| B | 11 | -0.00897 | 0.00834  | 0.00894  |
| B | 12 | -0.03154 | 0.01657  | -0.00448 |
| B | 13 | -0.00301 | 0.00945  | 0.00249  |
| B | 14 | 0.00549  | 0.00293  | 0.00367  |
| B | 15 | -0.02929 | 0.00369  | -0.00336 |
| B | 16 | -0.00842 | -0.02860 | 0.00253  |
| C | 1  | 0.00326  | 0.00313  | 0.00050  |
| C | 2  | -0.00256 | -0.00122 | 0.00746  |
| N | 1  | 0.00923  | 0.01183  | -0.00012 |
| N | 2  | -0.02030 | -0.00614 | 0.00650  |
| N | 3  | 0.00069  | 0.00257  | -0.00619 |
| N | 4  | -0.01959 | -0.00521 | 0.02338  |
| N | 5  | 0.00309  | 0.00656  | 0.00966  |
| N | 6  | -0.00497 | 0.00323  | -0.01404 |
| N | 7  | -0.00320 | -0.00948 | -0.01211 |
| N | 8  | 0.00803  | 0.00133  | 0.00543  |
| O | 1  | 0.01649  | 0.00282  | 0.02575  |

---

**Methanol/B<sub>2</sub>N:**

|   |   | <b>x</b> | <b>y</b> | <b>z</b> |
|---|---|----------|----------|----------|
| H | 1 | -0.01033 | -0.01435 | 0.00188  |
| H | 2 | 0.02495  | -0.01703 | 0.00103  |
| H | 3 | 0.00324  | -0.00610 | 0.01893  |

|   |    |          |          |          |
|---|----|----------|----------|----------|
| H | 4  | -0.00831 | -0.00454 | -0.00490 |
| B | 1  | 0.01325  | 0.00413  | -0.00845 |
| B | 2  | 0.00055  | 0.00412  | -0.00256 |
| B | 3  | 0.01334  | 0.00513  | 0.00558  |
| B | 4  | -0.01447 | -0.00543 | 0.01143  |
| B | 5  | -0.01969 | -0.01297 | 0.00791  |
| B | 6  | -0.01388 | -0.00130 | -0.00887 |
| B | 7  | 0.01256  | -0.00623 | 0.00770  |
| B | 8  | -0.02148 | -0.00625 | -0.01610 |
| B | 9  | 0.00097  | 0.00639  | 0.00376  |
| B | 10 | 0.00497  | 0.00111  | 0.01658  |
| B | 11 | 0.00466  | 0.01035  | -0.01326 |
| B | 12 | -0.00031 | 0.01363  | 0.02013  |
| B | 13 | 0.01043  | 0.00184  | 0.00994  |
| B | 14 | -0.00301 | 0.00109  | -0.02000 |
| B | 15 | -0.00145 | -0.00172 | 0.00233  |
| B | 16 | 0.00091  | 0.00695  | -0.00650 |
| C | 1  | -0.00924 | -0.02059 | -0.00292 |
| N | 1  | 0.01074  | 0.00613  | -0.02618 |
| N | 2  | 0.01516  | 0.00140  | -0.01935 |
| N | 3  | -0.00088 | 0.00208  | 0.00097  |
| N | 4  | -0.00971 | 0.00705  | 0.00371  |
| N | 5  | -0.00306 | 0.01852  | 0.02736  |
| N | 6  | 0.01779  | -0.00199 | 0.01201  |
| N | 7  | -0.01571 | -0.01584 | -0.02770 |
| N | 8  | 0.00039  | 0.00708  | 0.00301  |
| O | 1  | -0.00239 | 0.01732  | 0.00252  |

---

**Formaldehyde/B<sub>2</sub>N:**

|   |    | <b>x</b> | <b>y</b> | <b>z</b> |
|---|----|----------|----------|----------|
| H | 1  | -0.01330 | 0.00267  | -0.00273 |
| H | 2  | -0.01127 | 0.01197  | -0.00475 |
| B | 1  | -0.00310 | -0.00507 | 0.02524  |
| B | 2  | 0.01240  | -0.00645 | -0.01134 |
| B | 3  | 0.01007  | -0.00178 | -0.02290 |
| B | 4  | 0.01359  | 0.01793  | 0.00252  |
| B | 5  | -0.00047 | 0.00109  | -0.00844 |
| B | 6  | 0.00272  | 0.01075  | -0.00300 |
| B | 7  | 0.00660  | -0.01274 | -0.01026 |
| B | 8  | 0.00035  | -0.01535 | -0.00331 |
| B | 9  | 0.00739  | 0.00486  | -0.00028 |
| B | 10 | -0.00367 | -0.01839 | 0.02046  |
| B | 11 | 0.00268  | -0.00080 | 0.00144  |
| B | 12 | -0.01311 | -0.00582 | 0.00503  |
| B | 13 | -0.01713 | -0.00551 | 0.00534  |
| B | 14 | 0.00551  | -0.02818 | -0.00336 |
| B | 15 | -0.00867 | -0.00152 | 0.00387  |
| B | 16 | -0.00216 | 0.00474  | 0.00256  |
| C | 1  | 0.00119  | 0.01657  | 0.01224  |
| N | 1  | 0.00292  | -0.00456 | -0.00907 |
| N | 2  | 0.00930  | 0.00085  | -0.00403 |
| N | 3  | 0.01345  | -0.00944 | -0.00479 |
| N | 4  | 0.00510  | -0.00639 | -0.01495 |
| N | 5  | 0.00011  | 0.00878  | 0.00400  |
| N | 6  | 0.00423  | 0.00639  | 0.00810  |
| N | 7  | -0.00435 | 0.02195  | 0.00055  |
| N | 8  | -0.00428 | 0.00448  | 0.00039  |
| O | 1  | -0.01610 | 0.00895  | 0.01148  |

---
